# Supplementary material
Source: publisher site journal article supplement (https://www.spandidos-publications.com/8543/downloadSupplementary)
Supplement: Supplementary file 1 [file downloadSupplementary]

Table SI. Genotype and allele frequency distribution of the VDR SNPs in PsV cases stratified by BMI status.

| <b>A, FokI (rs2228570)</b> |                                               |                                 |
|----------------------------|-----------------------------------------------|---------------------------------|
| <b>Genotype/allele</b>     | <b>BMI <math>\geq</math>25 (n=142), n (%)</b> | <b>BMI &lt;25 (n=61), n (%)</b> |
| CC                         | 73 (51.41)                                    | 23 (37.71)                      |
| TC                         | 53 (37.32)                                    | 30 (49.18)                      |
| TT                         | 16 (11.27)                                    | 8 (13.11)                       |
| C                          | 199 (70.07)                                   | 76 (62.30)                      |
| T                          | 85 (29.93)                                    | 46 (37.70)                      |
| <b>B, BsmI (rs1544410)</b> |                                               |                                 |
| <b>Genotype/allele</b>     | <b>BMI <math>\geq</math>25 (n=142), n (%)</b> | <b>BMI &lt;25 (n=61), n (%)</b> |
| GG                         | 43 (30.28)                                    | 19 (31.15)                      |
| GA                         | 80 (56.34)                                    | 27 (44.26)                      |
| AA                         | 19 (13.38)                                    | 15 (24.59)                      |
| G                          | 166 (58.45)                                   | 65 (53.28)                      |
| A                          | 118 (41.55)                                   | 57 (46.72)                      |
| <b>C, TaqI (rs731236)</b>  |                                               |                                 |
| <b>Genotype/allele</b>     | <b>BMI <math>\geq</math>25 (n=142), n (%)</b> | <b>BMI &lt;25 (n=61), n (%)</b> |
| TT                         | 45 (31.69)                                    | 20 (32.79)                      |
| CT                         | 64 (45.07)                                    | 24 (39.34)                      |
| CC                         | 33 (23.24)                                    | 17 (27.87)                      |
| T                          | 154 (54.23)                                   | 64 (52.46)                      |
| C                          | 130 (45.77)                                   | 58 (47.54)                      |

The BMI was calculated as weight in kilograms divided by height in meters squared. PsV, psoriasis vulgaris; SNPs, single nucleotide polymorphisms; VDR, vitamin D receptor.

Table SII. Genetic model analysis of the VDR SNPs in PsV cases stratified by BMI status.

| <b>A, FokI (rs2228570)</b>  |                     |                |                         |
|-----------------------------|---------------------|----------------|-------------------------|
| <b>Genetic model</b>        | <b>OR (95% CI)</b>  | <b>P-value</b> | <b>Adjusted P-value</b> |
| Dominant TT + TC vs. CC     | 0.572 (0.310-1.057) | 0.074          | 0.404                   |
| Recessive TT vs. TC + CC    | 0.841 (0.340-2.085) | 0.709          | 0.874                   |
| Overdominant TC vs. TT + CC | 0.615 (0.336-1.128) | 0.117          | 0.468                   |
| Allelic T vs. C             | 0.706 (0.452-1.102) | 0.124          | 0.478                   |
| <b>B, BsmI (rs1544410)</b>  |                     |                |                         |
| <b>Genetic model</b>        | <b>OR (95% CI)</b>  | <b>P-value</b> | <b>Adjusted P-value</b> |
| Dominant AA + GA vs. GG     | 1.042 (0.544-1.994) | 0.902          | 0.928                   |
| Recessive AA vs. GA + GG    | 0.474 (0.222-1.010) | 0.053          | 0.364                   |
| Overdominant GA vs. GG + AA | 1.625 (0.888-2.974) | 0.115          | 0.468                   |
| Allelic A vs. G             | 0.811 (0.518-1.272) | 0.335          | 0.659                   |
| <b>C, TaqI (rs731236)</b>   |                     |                |                         |
| <b>Genetic model</b>        | <b>OR (95% CI)</b>  | <b>P-value</b> | <b>Adjusted P-value</b> |
| Dominant CC + CT vs. TT     | 1.051 (0.554-1.996) | 0.878          | 0.921                   |
| Recessive CC vs. CT + TT    | 0.784 (0.396-1.550) | 0.483          | 0.734                   |
| Overdominant CT vs. TT + CC | 1.265 (0.687-2.330) | 0.451          | 0.718                   |
| Allelic C vs. T             | 0.931 (0.596-1.458) | 0.744          | 0.893                   |

P-values were adjusted by Benjamini-Hochberg correction. OR, odds ratio; PsV, psoriasis vulgaris; SNPs, single nucleotide polymorphisms; VDR, vitamin D receptor.

Table SIII. Genotype and allele frequency distribution of the VDR SNPs in mild and severe PsV cases.

| <b>A, FokI (rs2228570)</b> |                                  |                               |
|----------------------------|----------------------------------|-------------------------------|
| <b>Genotype/allele</b>     | <b>Severe PsV (n=156), n (%)</b> | <b>Mild PsV (n=47), n (%)</b> |
| CC                         | 72 (46.15)                       | 24 (51.06)                    |
| TC                         | 66 (42.31)                       | 17 (36.17)                    |
| TT                         | 18 (11.54)                       | 6 (12.77)                     |
| C                          | 210 (67.31)                      | 65 (69.15)                    |
| T                          | 102 (32.69)                      | 29 (30.85)                    |
| <b>B, BsmI (rs1544410)</b> |                                  |                               |
| <b>Genotype/allele</b>     | <b>Severe PsV (n=156), n (%)</b> | <b>Mild PsV (n=47), n (%)</b> |
| GG                         | 50 (32.05)                       | 12 (25.53)                    |
| GA                         | 80 (51.28)                       | 27 (57.45)                    |
| AA                         | 26 (16.67)                       | 8 (17.02)                     |
| G                          | 180 (57.69)                      | 51 (54.26)                    |
| A                          | 132 (42.31)                      | 43 (45.74)                    |
| <b>C, TaqI (rs731236)</b>  |                                  |                               |
| <b>Genotype/allele</b>     | <b>Severe PsV (n=156), n (%)</b> | <b>Mild PsV (n=47), n (%)</b> |
| TT                         | 53 (33.97)                       | 12 (25.53)                    |
| CT                         | 66 (42.31)                       | 22 (46.81)                    |
| CC                         | 37 (23.72)                       | 13 (27.66)                    |
| T                          | 172 (55.13)                      | 46 (48.94)                    |
| C                          | 140 (44.87)                      | 48 (51.06)                    |

PsV, psoriasis vulgaris; SNPs, single nucleotide polymorphisms; VDR, vitamin D receptor.

Table SIV. Genetic model analysis of the VDR SNPs in mild and severe PsV cases.

| <b>A, FokI (rs2228570)</b>  |                     |                |                         |
|-----------------------------|---------------------|----------------|-------------------------|
| <b>Genetic model</b>        | <b>OR (95% CI)</b>  | <b>P-value</b> | <b>Adjusted P-value</b> |
| Dominant TT + TC vs. CC     | 1.217 (0.634-2.339) | 0.555          | 0.789                   |
| Recessive TT vs. TC + CC    | 0.891 (0.332-2.393) | 0.819          | 0.921                   |
| Overdominant TC vs. TT + CC | 1.294 (0.659-2.540) | 0.454          | 0.718                   |
| Allelic T vs. C             | 1.089 (0.662-1.790) | 0.738          | 0.893                   |
| <b>B, BsmI (rs1544410)</b>  |                     |                |                         |
| <b>Genetic model</b>        | <b>OR (95% CI)</b>  | <b>P-value</b> | <b>Adjusted P-value</b> |
| Dominant AA + GA vs. GG     | 0.727 (0.348-1.519) | 0.396          | 0.691                   |
| Recessive AA vs. GA + GG    | 0.975 (0.409-2.326) | 0.954          | 0.963                   |
| Overdominant GA vs. GG + AA | 0.780 (0.404-1.506) | 0.459          | 0.718                   |
| Allelic A vs. G             | 0.870 (0.547-1.383) | 0.638          | 0.830                   |
| <b>C, TaqI (rs731236)</b>   |                     |                |                         |
| <b>Genetic model</b>        | <b>OR (95% CI)</b>  | <b>P-value</b> | <b>Adjusted P-value</b> |
| Dominant CC + CT vs. TT     | 0.666 (0.320-1.389) | 0.279          | 0.641                   |
| Recessive CC vs. CT + TT    | 0.813 (0.389-1.701) | 0.583          | 0.810                   |
| Overdominant CT vs. TT + CC | 0.833 (0.433-1.604) | 0.585          | 0.810                   |
| Allelic C vs. T             | 0.780 (0.492-1.238) | 0.291          | 0.655                   |

P-values were adjusted by Benjamini-Hochberg correction. OR, odds ratio; PsV, psoriasis vulgaris; SNPs, single nucleotide polymorphisms; VDR, vitamin D receptor.

Table SV. Genotype and allele frequency distribution of the VDR SNPs in PsV cases with and without scalp involvement.

| <b>A, FokI (rs2228570)</b> |                                      |                                        |
|----------------------------|--------------------------------------|----------------------------------------|
| <b>Genotype/allele</b>     | <b>With scalp PsV (n=115), n (%)</b> | <b>Without scalp PsV (n=88), n (%)</b> |
| CC                         | 51 (44.35)                           | 45 (51.14)                             |
| TC                         | 53 (46.09)                           | 30 (34.09)                             |
| TT                         | 11 (9.56)                            | 13 (14.77)                             |
| C                          | 155 (67.39)                          | 120 (68.18)                            |
| T                          | 75 (32.61)                           | 56 (31.82)                             |
| <b>B, BsmI (rs1544410)</b> |                                      |                                        |
| <b>Genotype/allele</b>     | <b>With scalp PsV (n=115), n (%)</b> | <b>Without scalp PsV (n=88), n (%)</b> |
| GG                         | 38 (33.05)                           | 24 (27.27)                             |
| GA                         | 59 (51.30)                           | 48 (54.55)                             |
| AA                         | 18 (15.65)                           | 16 (18.18)                             |
| G                          | 135 (58.70)                          | 96 (54.55)                             |
| A                          | 95 (41.30)                           | 80 (45.45)                             |
| <b>C, TaqI (rs731236)</b>  |                                      |                                        |
| <b>Genotype/allele</b>     | <b>With scalp PsV (n=115), n (%)</b> | <b>Without scalp PsV (n=88), n (%)</b> |
| TT                         | 40 (34.78)                           | 25 (28.41)                             |
| CT                         | 49 (42.61)                           | 39 (44.32)                             |
| CC                         | 26 (22.61)                           | 24 (27.27)                             |
| T                          | 129 (56.09)                          | 89 (50.57)                             |
| C                          | 101 (43.91)                          | 87 (49.43)                             |

PsV, psoriasis vulgaris; SNPs, single nucleotide polymorphisms; VDR, vitamin D receptor.

Table SVI. Genetic model analysis of the VDR SNPs in PsV cases with and without scalp involvement.

| <b>A, FokI (rs2228570)</b>  |                     |                |                         |
|-----------------------------|---------------------|----------------|-------------------------|
| <b>Genetic model</b>        | <b>OR (95% CI)</b>  | <b>P-value</b> | <b>Adjusted P-value</b> |
| Dominant TT + TC vs. CC     | 1.313 (0.753-2.292) | 0.337          | 0.659                   |
| Recessive TT vs. TC + CC    | 0.610 (0.259-1.436) | 0.258          | 0.641                   |
| Overdominant TC vs. TT + CC | 1.653 (0.932-2.932) | 0.086          | 0.404                   |
| Allelic T vs. C             | 1.037 (0.667-1.616) | 0.866          | 0.921                   |
| <b>B, BsmI (rs1544410)</b>  |                     |                |                         |
| <b>Genetic model</b>        | <b>OR (95% CI)</b>  | <b>P-value</b> | <b>Adjusted P-value</b> |
| Dominant AA + GA vs. GG     | 0.760 (0.413-1.397) | 0.377          | 0.690                   |
| Recessive AA vs. GA + GG    | 0.835 (0.399-1.749) | 0.633          | 0.830                   |
| Overdominant GA vs. GG + AA | 0.878 (0.503-1.532) | 0.647          | 0.832                   |
| Allelic A vs. G             | 0.844 (0.557-1.280) | 0.403          | 0.691                   |
| <b>C, TaqI (rs731236)</b>   |                     |                |                         |
| <b>Genetic model</b>        | <b>OR (95% CI)</b>  | <b>P-value</b> | <b>Adjusted P-value</b> |
| Dominant CC + CT vs. TT     | 0.744 (0.408-1.358) | 0.335          | 0.659                   |
| Recessive CC vs. CT + TT    | 0.779 (0.410-1.479) | 0.445          | 0.718                   |
| Overdominant CT vs. TT + CC | 0.933 (0.533-1.633) | 0.808          | 0.919                   |
| Allelic C vs. T             | 0.801 (0.530-1.211) | 0.269          | 0.641                   |

P-values were adjusted by Benjamini-Hochberg correction. OR, odds ratio; PsV, psoriasis vulgaris; SNPs, single nucleotide polymorphisms; VDR, vitamin D receptor.

Table SVII. Genotype and allele frequency distribution of the VDR SNPs in PsV cases with and without genital involvement.

| <b>A, FokI (rs2228570)</b> |                                       |                                           |
|----------------------------|---------------------------------------|-------------------------------------------|
| <b>Genotype/allele</b>     | <b>With genital PsV (n=55), n (%)</b> | <b>Without genital PsV (n=148), n (%)</b> |
| CC                         | 23 (41.82)                            | 73 (49.32)                                |
| TC                         | 25 (45.45)                            | 58 (39.19)                                |
| TT                         | 7 (12.73)                             | 17 (11.49)                                |
| C                          | 71 (64.55)                            | 204 (68.92)                               |
| T                          | 39 (35.45)                            | 92 (31.08)                                |
| <b>B, BsmI (rs1544410)</b> |                                       |                                           |
| <b>Genotype/allele</b>     | <b>With genital PsV (n=55), n (%)</b> | <b>Without genital PsV (n=148), n (%)</b> |
| GG                         | 21 (38.18)                            | 41 (27.70)                                |
| GA                         | 26 (47.27)                            | 81 (54.73)                                |
| AA                         | 8 (14.55)                             | 26 (17.57)                                |
| G                          | 68 (61.82)                            | 163 (55.07)                               |
| A                          | 42 (38.18)                            | 133 (44.93)                               |
| <b>C, TaqI (rs731236)</b>  |                                       |                                           |
| <b>Genotype/allele</b>     | <b>With genital PsV (n=55), n (%)</b> | <b>Without genital PsV (n=148), n (%)</b> |
| TT                         | 21 (38.19)                            | 44 (29.73)                                |
| CT                         | 25 (45.45)                            | 63 (42.57)                                |
| CC                         | 9 (16.36)                             | 41 (27.70)                                |
| T                          | 67 (60.91)                            | 151 (51.01)                               |
| C                          | 43 (39.09)                            | 145 (48.99)                               |

PsV, psoriasis vulgaris; SNPs, single nucleotide polymorphisms; VDR, vitamin D receptor.

Table SVIII. Genetic model analysis of the VDR SNPs in PsV cases with and without genital involvement.

| <b>A, FokI (rs2228570)</b>  |                     |                |                         |
|-----------------------------|---------------------|----------------|-------------------------|
| <b>Genetic model</b>        | <b>OR (95% CI)</b>  | <b>P-value</b> | <b>Adjusted P-value</b> |
| Dominant TT + TC vs. CC     | 1.354 (0.725-2.531) | 0.342          | 0.659                   |
| Recessive TT vs. TC + CC    | 1.124 (0.439-2.878) | 0.808          | 0.919                   |
| Overdominant TC vs. TT + CC | 1.293 (0.692-2.416) | 0.420          | 0.709                   |
| Allelic T vs. C             | 1.218 (0.768-1.933) | 0.402          | 0.691                   |
| <b>B, BsmI (rs1544410)</b>  |                     |                |                         |
| <b>Genetic model</b>        | <b>OR (95% CI)</b>  | <b>P-value</b> | <b>Adjusted P-value</b> |
| Dominant AA + GA vs. GG     | 0.620 (0.323-1.191) | 0.151          | 0.544                   |
| Recessive AA vs. GA + GG    | 0.799 (0.338-1.889) | 0.609          | 0.822                   |
| Overdominant GA vs. GG + AA | 0.742 (0.399-1.379) | 0.345          | 0.659                   |
| Allelic A vs. G             | 0.757 (0.470-1.211) | 0.222          | 0.641                   |
| <b>C, TaqI (rs731236)</b>   |                     |                |                         |
| <b>Genetic model</b>        | <b>OR (95% CI)</b>  | <b>P-value</b> | <b>Adjusted P-value</b> |
| Dominant CC + CT vs. TT     | 0.685 (0.358-1.310) | 0.253          | 0.641                   |
| Recessive CC vs. CT + TT    | 0.511 (0.229-1.136) | 0.100          | 0.432                   |
| Overdominant CT vs. TT + CC | 1.124 (0.603-2.096) | 0.712          | 0.874                   |
| Allelic C vs. T             | 0.668 (0.416-1.067) | 0.076          | 0.404                   |

P-values were adjusted by Benjamini-Hochberg correction. OR, odds ratio; PsV, psoriasis vulgaris; SNPs, single nucleotide polymorphisms; VDR, vitamin D receptor.
